# Human cytomegalovirus nuclear capsid motility is non-directed and independent of nuclear actin bundles

1 **Felix Flomm<sup>a\*</sup>, Eva Maria Borst<sup>b\*</sup>, Thomas Günther<sup>a</sup>, Rudolph Reimer<sup>a</sup>, Laura de Vries<sup>a</sup>,**  
2 **Carola Schneider<sup>a</sup>, Adam Grundhoff<sup>a</sup>, Kay Grünewald<sup>c,d</sup>, Martin Messerle<sup>b,d</sup>, Jens Bern-**  
3 **hard Bosse<sup>a#</sup>**

4 <sup>a</sup> Heinrich-Pette-Institut, Leibniz-Institut für Experimentelle Virologie, Hamburg, Germany

5 <sup>b</sup>Department of Virology, Hannover Medical School, 30625 Hannover, Germany

6 <sup>c</sup>Centre of Structural Systems Biology (CSSB), Notkestr. 85, D-22607, Heinrich-Pette-Insti-  
7 tute/ University of Hamburg, Hamburg, Germany

8 <sup>d</sup>Cluster of Excellence RESIST (EXC 2155), Hannover Medical School, Hannover, Germany.

9

10 \*FF and EMB contributed equally to this work

11 #Address correspondence to Jens Bernhard Bosse, [jens.bosse@leibniz-hpi.de](mailto:jens.bosse@leibniz-hpi.de)

12

13

14 **Running title: HCMV nuclear capsid motility**

15

16 **Keywords: Nucleus, F-actin, CMV, Single particle tracking, Microscopy**

17

## 18 **Abstract**

19 Herpesvirus genome replication, capsid assembly and packaging take place in the host cell  
20 nucleus. Matured capsids leave the nucleus through a unique envelopment-de-envelopment  
21 process at the nuclear membranes called nuclear egress. How assembled and DNA-contain-  
22 ing herpesvirus capsids reach the sites of nuclear egress is however still controversially dis-  
23 cussed, as host chromatin that marginalizes during infection might constitute a major barrier.  
24 For alphaherpesviruses, previous work has suggested that nuclear capsids use active  
25 transport mediated by nuclear filamentous actin (F-actin). However, direct evidence for nu-  
26 clear capsid motility on nuclear F-actin was missing. Our subsequent work did not detect  
27 nuclear F-actin associated with motile capsids, but instead found evidence for chromatin re-  
28 modeling to facilitate passive capsid diffusion. A recent report described that human cyto-  
29 megalovirus, a betaherpesvirus, induces nuclear F-actin and that the motor protein myosin V  
30 localizes to these structures. Direct evidence of capsid recruitment to these structures and  
31 motility on them was however missing. In this study, we tested the functional role of HCMV-  
32 induced, nuclear actin assemblies for capsid transport. We did not observe transport events  
33 along nuclear F-actin. Instead, reproduction of nuclear F-actin was only possible using strong  
34 overexpression of the fluorescent marker LifeAct-mCherry-NLS. Also, two alternative fluo-  
35 rescent F-actin markers did not detect F-actin in HCMV-infected cells. Furthermore, single  
36 particle tracking of nuclear HCMV capsids showed no indication for active transport, which is  
37 in line with previous work on alphaherpesviruses.

## 38 **Importance**

39 Although human cytomegalovirus hardly causes disease in healthy individuals, it constitutes  
40 a major hazard to immunocompromised risk groups. Human Cytomegalovirus infests nearly

41 all organs and can cause severe disease such as pneumonitis, colitis, encephalitis and reti-  
42 nitis, and can lead to serious impairments in neonates. Currently available treatments target  
43 only two steps during the viral 'life cycle', which makes the occurrence of viral resistance a  
44 major problem. To identify targets for pharmaceuticals, in-depth knowledge of the molecular  
45 mechanisms of the viral infection is paramount. Since the virus relies on the ability to release  
46 infectious particles from a host cell to infect another cell, its ability to translocate these parti-  
47 cles within a cell is critical to complete the viral 'life cycle'. This work indicates that remodeling  
48 of cellular chromatin, rather than molecular motors, enables capsid access to the nuclear  
49 membrane. Understanding the mechanism of chromatin remodeling might help in designing  
50 effective inhibitors.

51

## 52 **Introduction**

53 HCMV, like other herpesviruses, creates infectious particles using a series of complex mor-  
54 phogenesis steps that lead to the fully assembled and infectious virion consisting of capsid,  
55 tegument, and envelope. These layers are subsequently added while the forming particles  
56 pass through several host-cell organelles (1, 2). Morphogenesis starts in the nucleus, where  
57 DNA replication, the formation of nucleocapsids, as well as the packaging of viral genomes  
58 into the latter takes place. Next, herpesvirus capsids must reach the nuclear envelope for  
59 primary envelopment and egress (3). How nuclear capsids cross the nucleoplasm is contro-  
60 versially discussed in the field. Earlier work suggested that herpes simplex virus type 1 (HSV-  
61 1) capsids exhibit directed nuclear motility as determined by single particle tracking. The ob-  
62 served directed motility could be antagonized by a putative myosin inhibitor as well as the  
63 actin-depolymerizing drug Latrunculin A, suggesting that capsids might use myosins to move  
64 actively on nuclear F-actin (4). One year later a study was able to detect F-actin in fixed rodent

65 neuronal cells infected with pseudorabies virus (PRV), using both fluorescence microscopy  
66 as well as serial-block-face scanning electron microscopy (SBFSEM) (5). However, we re-  
67 cently did not detect any nuclear F-actin in fibroblasts infected with the alphaherpesviruses  
68 HSV-1, PRV, the betaherpesvirus murine cytomegalovirus (MCMV) or the gammaherpesvirus  
69 murine herpesvirus-68 (MHV-68), while nuclear capsid motility in these cells was detectable  
70 (6)

71 Moreover, we found that Latrunculin A was able to induce aberrant actin assemblies that  
72 seemed to unspecifically bind viral capsids and block their movement (6, 7). Since direct ev-  
73 idence of capsid motility along nuclear actin filaments was missing, and advances in camera  
74 technology now allow much more precise measurements, we re-evaluated previous findings.  
75 Using a custom microscope design, we acquired several thousand alphaherpesvirus nuclear  
76 capsid tracks. Analysis of these tracks showed no indication of bulk directed motility of nuclear  
77 herpesvirus capsids. Instead, we found that infection-induced chromatin remodeling allowed  
78 capsids to cross the nucleoplasm by diffusion to reach the nuclear envelope.

79 These findings are supported by two recent reports in which the authors were able to resolve  
80 interchromatin channels that bridge through the marginalized chromatin in HSV-1 infected  
81 cells to supposed egress sites at the nuclear envelope (8). Computational modeling using our  
82 experimentally determined diffusion coefficients indicates that these channels allow herpes-  
83 virus capsids to reach the nuclear envelope by diffusion with(9).

84 In discordance with these findings, a recent report showed large nuclear actin filaments in  
85 human foreskin fibroblast (HFF) cells stably expressing LifeAct-GFP-NLS and infected with  
86 HCMV (10). In addition, the authors found that prolonged incubation of infected cells with very  
87 high concentrations of the F-actin-depolymerizing drug Latrunculin A led to a defect in infec-  
88 tious virus production as well as their translocation to the cytoplasm, and suggested that these  
89 filaments are involved in movement of capsids to the nuclear periphery for nuclear egress.

90 Moreover, myosin Va was implicated in nuclear egress, as the authors found a colocalization  
91 of myosin Va with the major capsid protein of HCMV at the rim of the viral replication com-  
92 partment, as well as an antagonizable effect of myosin Va on nuclear capsid localization to  
93 the nuclear envelope (11).

94 These findings might argue for a role of nuclear F-actin in the trafficking of betaherpesvirus  
95 nucleocapsids to nuclear egress sites. However, direct evidence for active motility of capsids  
96 along nuclear filaments is missing. Recently, we developed a UL77-mGFP-tagged HCMV  
97 mutant that produces fluorescent nuclear capsids (12). We, therefore, set out to analyze the  
98 motility of HCMV nuclear capsids in relation to nuclear actin filaments by single particle track-  
99 ing. While aiming at reproducing the induction of nuclear F-actin in HCMV-infected cells ex-  
100 pressing LifeAct-NLS, we found that nuclear filament induction is dependent on the expres-  
101 sion level and cellular localization of the utilized actin live-cell marker LifeAct. In our hands,  
102 only cells with very high expression levels of LifeAct-mCherry-NLS presented nuclear fila-  
103 ments, and reducing the expression levels by using a weaker promotor or utilizing a weakly  
104 expressing cell population almost completely abrogated nuclear filament occurrence. Two  
105 alternative fluorescent F-actin markers were unable to detect F-actin in HCMV-infected cells.  
106 Using electron microscopy, we could only detect nuclear F-actin in infected cells expressing  
107 mCherry-LifeAct-NLS, while in the absence of mCherry-LifeAct-NLS infected cells did not  
108 show any. Finally, deleting the NLS abolished nuclear F-actin formation, which led us to con-  
109 clude that nuclear actin induction in this system is an artifact of LifeAct-NLS overexpression.  
110 In accordance, we did not find transport events along nuclear F-actin employing single particle  
111 tracking. Instead, nuclear HCMV capsids showed diffusive motility with no indication for active  
112 transport, which fits our measurements that HCMV infection also remodels the nuclear chro-

113 matin structure to facilitate particle diffusion as described previously for members of the al-  
114 pha herpesviruses. We, therefore, conclude that LifeAct-NLS serves as both an expression-  
115 level-dependent inducer and detector of nuclear actin filaments in HCMV-infected cells, while  
116 HCMV infection itself does not induce nuclear actin in normal fibroblasts.

117

## 118 **Results**

### 119 **HCMV infection does not induce nuclear actin filaments when LifeAct-NLS is ex- 120 pressed at medium levels**

121 To test if nuclear HCMV capsids would use LifeAct-stainable nuclear filamentous actin for  
122 transport, we first generated stable cell lines expressing LifeAct-mCherry-NLS similarly to an  
123 approach reported earlier (10) based on both primary HFFs (data not shown) as well as  
124 hTERT immortalized BJ cells. To visualize viral capsids, we used our recently described  
125 UL77-tagged HCMV mutant (12). Since this UL77-mGFP fusion already occupied the GFP  
126 channel, we exchanged GFP in the original LifeAct construct (RRID: Addgene\_58467) with  
127 the red-fluorescent mCherry, resulting in cells showing a homogenous nuclear LifeAct signal  
128 which was slightly enriched in what seemed to be nucleoli. To our surprise, infection with  
129 either WT, UL77-GFP, or another fluorescent virus, that produces UL32EGFP and  
130 UL100mCherry, did not result in the formation of nuclear LifeAct-positive filaments in the vast  
131 majority of cells. Only very rarely (2.33% of infected cells) and only in cells expressing high  
132 amounts of LifeAct, we found nuclear filaments (Fig. 1A/B).

133

### 134 **The occurrence of nuclear actin filaments correlates with the expression level of Life- 135 Act-NLS**

136 Interestingly, the already low frequency of nuclear filaments decreased even further with on-  
137 going infection, such that it was not possible to detect any cells with nuclear filaments later  
138 than 24 hours post infection (HPI) (Fig. 1B). We quantified nuclear LifeAct-mCherry-NLS in-  
139 tensities and found that intensities decreased with ongoing infection (as indicated by nuclear  
140 IE1 and nuclear pUL32-EGFP signals; Fig. 2A-C) to levels that were still easily detectable  
141 using standard excitation levels but seemingly insufficient for filament formation.

142 Since the induction of nuclear actin assemblies appeared to be dependent on high expression  
143 levels of LifeAct, we assumed that the promoter driving LifeAct-mCherry-NLS expression  
144 might critically influence the appearance of these structures. In our expression system, we  
145 used a spleen focus-forming virus- (SFFV-) promoter instead of a phosphoglycerate kinase-  
146 (PGK-) promoter utilized in the original report (10), which led to the decrease in LifeAct-  
147 mCherry-NLS signal intensity. We hypothesized that HCMV infection might interfere with ex-  
148 pression from the SFFV promoter and therefore generated an alternative stable cell line ex-  
149 pressing LifeAct-mCherry-NLS driven by the HCMV-Immediate early (HCMV-IE) promoter.  
150 We expected this promoter to increase LifeAct-mCherry-NLS expression in HCMV-infected  
151 cells. Indeed, we found that nuclear mCherry intensities increased when these cells were  
152 infected with HCMV up to 48hpi as shown in Fig. 3 A and B.

153 Importantly, we were now also able to detect nuclear filaments in infected cells although at  
154 lower levels compared to the earlier report (10). However, LifeAct expression decreased with  
155 progressing infection and at 72hpi reached levels that were comparable to mock-infected cells  
156 (see histograms). This effect correlated with HCMV immediate early protein 1 (IE1) expres-  
157 sion kinetics as also shown Figs 3A and B. We did not detect filaments in the mock-infected  
158 cells, which is consistent with our previous experiments that showed no actin filaments stain-

159 able with LifeAct or with phalloidin in non-infected cells. Upon infection, we were able to vis-  
160 ualize nuclear actin assemblies in significant quantities (Figure 4). The high expression levels  
161 of LifeAct-mCherry-NLS seemed to affect cell growth, as overall LifeAct-mCherry-NLS ex-  
162 pression levels were reduced quickly after a few passages, which made it challenging to keep  
163 expression levels constant in between experiments. Therefore, we show the results of exper-  
164 imental replicates separately in Figure 4 A-D. As can be seen in Figure 4E, later passages  
165 used in experiment 2 and 3 showed reduced LifeAct-mCherry-NLS expression compared to  
166 earlier passages (experiment 1 and 4). LifeAct-mCherry-NLS expression in mock-infected  
167 cells correlated well with the amount of nuclear filament induction after infection (compare  
168 Fig. 4A/D to 4B/C), which indicates that filament induction is dependent on the LifeAct-  
169 mCherry-NLS level. Also, LifeAct-mCherry-NLS intensities were exceptionally strong in cells  
170 that showed filaments after infection compared to cells that did not as shown in Fig.4F, sup-  
171 porting the idea that LifeAct-mCherry-NLS acts as a concentration-dependent inducer of nu-  
172 clear F-actin assembly after HCMV infection.

173 Of note, cells that showed nuclear actin filaments 72hpi seemed to be delayed in the progres-  
174 sion of infection as indicated by the expression level of pUL32-EGFP (Fig. 5A, arrows), often  
175 leading to the mutual exclusion of high LifeAct and pUL32 expression (Fig. 5B).

176

### 177 **Cells not expressing LifeAct do not show Phalloidin-stainable nuclear actin assem-** 178 **blies during infection**

179 Since our results suggested that LifeAct is an inducer and also detector of filamentous nuclear  
180 actin at high expression levels, we next wanted to test if mock cells also show F-actin induc-  
181 tion after HCMV infection. To do so, we first tested if the widely utilized fluorescent Phalloidin  
182 can detect LifeAct-induced nuclear filaments. We infected BJ cells expressing LifeAct-  
183 mCherry-NLS driven by the HCMV major immediate early promotor (MIEP) with HCMV-HB5-



184 UL77-mGFP and fixed and stained them with fluorescent Phalloidin at 24hpi. As shown in  
185 Fig. 6, LifeAct-positive nuclear filaments could also be detected with fluorescent Phalloidin.  
186 Importantly, however, we could not detect any nuclear actin structures in wt BJ cells infected  
187 with HCMV-HB5-UL77-mGFP.

188 Interestingly, almost all (95%) BJ-CMV-LifeAct-mCherry-NLS cells that showed nuclear fila-  
189 ments were infected as shown by IE1 staining, which indicates that the infection may be the  
190 cause of the filament induction. Again we observed that cells showing nuclear actin assem-  
191 blies had exceptionally high LifeAct expression levels. These findings point towards a con-  
192 centration-dependent interference of LifeAct-NLS probes with nuclear actin polymerization  
193 dynamics which has been described previously (13, 14). We also observed that the infection  
194 rate in BJ-CMV-LifeAct-mCherry-NLS cells was significantly lower than in WT-BJ cells, which  
195 further indicates that nuclear LifeAct-mCherry-NLS inhibits HCMV replication.

196

#### 197 **Deleting the NLS precludes LifeAct-dependent induction of nuclear actin assemblies**

198 Since our results argue for a cumulative effect of both LifeAct-mCherry-NLS expression and  
199 HCMV infection on nuclear actin availability and polymerization dynamics, we wanted to test  
200 if the NLS is the key to the induction of nuclear actin assemblies. We therefore created a cell  
201 line expressing LifeAct-mCherry without an NLS. As shown in Fig. 7, we did not detect nuclear  
202 actin filaments throughout infection in these cells, indicating that LifeAct-NLS-mediated shut-  
203 tling of G-actin into the nucleus might play a role in the formation of nuclear filaments.  
204 Off note, we sometimes observed thick cytoplasmic actin assemblies in infected cells ex-  
205 pressing a high level of LifeAct, which might indicate that LifeAct can also induce similar as-  
206 semblies in the cytoplasm (Fig. 7 arrow) when convoluted with other actin-modulating inter-  
207 ferences like HCMV infection.

208

209 **An alternative live-cell actin probe fails to detect nuclear actin assemblies during in-**  
210 **fection**

211 Recent reports have shown that LifeAct fused to an NLS can interfere with nuclear actin dy-  
212 namics (13) and some authors recommend nanobody technology as a better alternative. Es-  
213 pecially an anti-nuclear-Actin Chromobody was referred to as minimally interfering with actin  
214 dynamics and therefore more suited to assess actin filament formation in the nucleus (13,  
215 15). We created a mixed cell clone expressing this nuclear-Actin Chromobody to have a spec-  
216 trum of different expression levels to investigate nuclear actin formation upon infection with  
217 HCMV. As shown in Figure 8, we did not find any nuclear filaments or other actin assemblies  
218 in these cells.

219

220 **Nuclear capsids do not move along LifeAct positive nuclear actin filaments**

221 To functionally test if HCMV-induced nuclear actin filaments or actin assemblies are used for  
222 directed nuclear capsid transport, we used an HCMV mutant that produces fluorescent cap-  
223 sids (HCMV UL77-GFP (12)). We infected BJ cells stably expressing LifeAct-mCherry-NLS  
224 with HCMV UL77-GFP and imaged cells 72 hpi post infection. As described above, infected  
225 cells showing nuclear actin structures were extremely rare. As shown in Figure 9 and suppl.  
226 videos S1 and S2, capsids visually did not move along nuclear actin structures but instead  
227 moved in a random-walk-like fashion through the nucleus.

228 To determine the motility mode of HCMV nuclear capsids at a quantitative level, we used  
229 single particle tracking as done previously for alphaherpesviruses (6). To this end, we infected  
230 BJ cells with HCMV UL77-GFP and imaged the cells shortly after first capsids appeared at  
231 72 hpi. To determine particle motility modes, we optimized our established particle tracking  
232 workflow (7) using a batch-adopted version of Trackmate (16) (see Materials and Methods).

233 Custom Matlab scripts (see Materials and Methods) allowed us to convert the data and feed  
234 it into MSDanalyzer (17) as described earlier (7).

235

236 We were able to extract a significantly larger number of particle tracks from our data using  
237 this approach, increasing the statistical validity of our analysis. In line with our visual assess-  
238 ment, our quantification of more than 17000 single tracks longer than 1 second (20 frames)  
239 showed that HCMV nuclear capsids do not engage in directed motility, but show slight sub-  
240 diffusion with an anomalous diffusion exponent  $\alpha$  of 0.74 in the nucleoplasm over short time-  
241 scales (Fig. 10). This result is a little lower than our previously published data for HSV-1 and  
242 PRV. A calculation of corral size, performed as in (7), revealed a corral size of approximately  
243 700nm and indicates that also HCMV remodels the nuclear structure very similarly to HSV-1  
244 and PRV, which in turn would allow nuclear capsids to cross large areas of the nuclear space  
245 by diffusion.

246

#### 247 **Electron microscopy could not to detect nuclear actin bundles in normal infected cells**

248 To determine if normal infected cells that do not express LifeAct-NLS show any form of nu-  
249 clear filaments that cannot be detected using fluorescent probes, we applied electron micros-  
250 copy as an additional tool. We seeded BJ-CMV-LifeAct-mCherry-NLS cells on sapphire discs  
251 and infected them with HCMV. The infected cells were checked by live-cell fluorescence mi-  
252 croscopy for the appearance of nuclear actin structures and subsequently high-pressure-fro-  
253 zen and processed for transmission electron microscopy. Indeed, we found thick bundles of  
254 nuclear filaments in a fraction of cells expressing LifeAct-mCherry-NLS (Fig. 11A-B, S3).  
255 However, in line with our previous experiments, we could not detect nuclear filaments in cells  
256 that expressed LifeAct-mCherry-NLS at low levels. The bundles showed strong similarity to

257 previously published nuclear actin bundles induced by overexpression of actin mutants (18).  
258 The bundles appeared more often close to the nuclear envelope, but we did not find evidence  
259 for filaments connecting the nuclear envelope to a nascent central viral replication compart-  
260 ment as proposed earlier (10).

261

## 262 **Discussion**

263 In this study, we investigated nuclear actin filament formation after HCMV infection. We found  
264 that only infection of cells highly overexpressing LifeAct-mCherry-NLS leads to nuclear fila-  
265 ment formation. Cells expressing lower levels of nuclear LifeAct-mCherry-NLS (which was  
266 still easily detectable) did not show filament induction. Furthermore, Phalloidin failed to detect  
267 nuclear filaments in infected cells that do not express LifeAct-mCherry-NLS, but was able to  
268 mark filaments in infected, LifeAct-overexpressing cells. We, therefore, conclude that LifeAct-  
269 mCherry-NLS is a concentration-dependent inducer of nuclear actin structures in HCMV-in-  
270 fected cells. Our results are supported by a previous study that showed that nuclear actin  
271 filaments could be induced by overexpression of NLS-actin fusion proteins (18) as well as a  
272 more recent study that describes the interference of LifeAct-NLS probes with nuclear actin  
273 dynamics, resulting in the formation of nuclear actin assemblies (13).

274 For this reason, a recent review recommended the use of alternative markers to assess the  
275 nuclear actin dynamics in living cells such as an anti-actin-chromobody (15). This probe failed  
276 to detect any filamentous actin structures in normal, HCMV-infected cells. In line with these  
277 results, TEM analysis showed large nuclear bundled filamentous structures in a subpopula-  
278 tion of HCMV-infected cells that expressed high levels of LifeAct-NLS. These structures are  
279 easily detectable in EM if they appear in normal infected cells. However, we could not detect

280 any of those structures in normal infected BJ cells. To our knowledge, there is also no EM-  
281 based evidence of nuclear actin bundles in HCMV-infected cells in the literature.

282 In our hands, capsid formation and nuclear filament induction appeared to be almost mutually  
283 exclusive, which indicates that overexpression of the LifeAct-mCherry-NLS probe is detri-  
284 mental for the progression of viral infection. For this reason, we could visualize capsid move-  
285 ment in the presence of actin assemblies in a few cells only. Still, capsid movement was  
286 independent of actin assemblies and was indistinguishable from capsid motility in fibroblasts  
287 not expressing LifeAct. Single particle tracking of HCMV nuclear capsids showed that diffu-  
288 sion is the main motility mode, and confirmed our previous results for HSV-1 and PRV (6, 7),  
289 indicating that nuclear capsid diffusion might be a conserved motility mode to cross the nu-  
290 cleoplasm. Support for this conclusion also comes from two recent studies in which the au-  
291 thors first show that HSV-1 induces egress channel formation through the marginalized chro-  
292 matin (8), which could represent the motility spaces that can be measured by tracking nuclear  
293 capsids ((7) and Fig. 10). Secondly, computational simulations using our experimentally de-  
294 termined diffusion coefficient suggest that these egress channels allow capsid translocation  
295 to the nuclear membrane by diffusion within minutes (9).

296 The question remains which molecular mechanism induces filament formation in LifeAct-NLS-  
297 expressing cells. Since a LifeAct construct without the NLS sequence was unable to induce  
298 actin structures in the nucleus of infected cells, we hypothesize that LifeAct-NLS increases  
299 the concentration of monomeric G-actin in the nucleus. Infection-induced disruption of cyto-  
300 plasmic F-actin (19) might increase the available G-actin pool, which could result in exceeding  
301 a nuclear concentration threshold at which filament formation occurs (18). While Wilkie et al.  
302 (10) did not detect an increase of nuclear actin monomers in infected cells, they did not com-  
303 pare cells with and without the LifeAct-GFP-NLS construct. It is therefore currently not clear

304 if increased amounts of monomeric G-actin get transported into the nucleus by LifeAct-NLS  
305 during HCMV infection.

306 The role of actin in the nucleus is a matter of current debate, and intimately connected to a  
307 discussion about the strengths and weaknesses of the actin probes used (14, 15, 20–25). A  
308 variety of roles has been described for nuclear actin in recent years, ranging from gene reg-  
309 ulation to structural organization (24). Widely used probes like LifeAct can interfere with nu-  
310 clear actin polymerization, and these caveats must be taken into account when assessing the  
311 biological role of nuclear actin filaments (13, 20). The reasons for the artifacts are often un-  
312 clear. However, it is likely that nuclear-targeted probes alter the nuclear concentration of actin  
313 monomers by shuttling G-actin into the nucleus (13, 14), which is also supported by our re-  
314 sults. Probe-induced nuclear filament formation has not only been described for LifeAct-NLS,  
315 but also for UTR261 and UTR230-NLS fusions (13, 14).

316 Based on our results we conclude that HCMV does not induce large-scale nuclear actin as-  
317 semblies, and that nuclear capsid motility is not dependent on large actin tracks. However,  
318 we cannot exclude that more subtle and maybe transient actin assemblies play a role in nu-  
319 clear morphogenesis events. Possible targets might be genome encapsidation and release  
320 of capsids from the replication compartment. Future studies will have to be carefully designed  
321 to examine the role of actin in nuclear herpesvirus morphogenesis while omitting the known  
322 pitfalls of nuclear actin probes.

323

## 324 **Materials and methods**

325 **Cells and viruses.** BJ-5ta hTERT-immortalized human fibroblasts were licensed from ATCC  
326 (CRL-4001) and cultivated in Dulbecco's Modified Eagles Medium Glutamax® (Thermofisher)

327 with 20% Medium 199 (Earles Salts) (Thermofisher), 10% FBS superior (Merck), 0.8 mM  
328 sodium pyruvate (Thermofisher) and 1 µg/ml Hygromycin (Invivogen).

329 BAC-derived AD169-based HCMV-HB5-UL77-mGFP is described in reference (12). HCMV-  
330 TB40-BAC<sub>kl.7</sub>-UL32EGFP-UL100mCherry is described in Sampaio et al. (26). The also TB40  
331 based HCMV-UL32-EGFP is reported in (27).

332

333 **pSFFV and pCMV-driven LifeAct-2XNLS expression constructs.** The lentiviral plasmid  
334 LeGO\_SFFV\_LifeAct-mCh-2XNLS was generated by designing a LifeAct-mCherry-2XNLS  
335 insert reflecting the pEGFP-C1\_LifeAct-EGFP\_2XNLS construct (20). (pEGFP-C1 LifeAct-  
336 EGFP-2XNLS was a gift from Dyché Mullins (RRID: Addgene\_58467). We also introduced  
337 an upstream 5' AvrII site to facilitate cloning. The resulting sequence was inserted into LeGO-  
338 iC2 (28), thereby replacing the original IRES-mCherry sequence of LeGO-iC2 between  
339 BamHI and BsrGI. To generate LeGO\_CMV\_LifeAct-mCh-2XNLS, we replaced the SFFV  
340 promoter of the original gene expression cassette by the HCMV major immediate early pro-  
341 moter sequence via standard PCR-based cloning using NheI and AvrII. Correct sequences  
342 of both expression constructs were confirmed by Sanger sequencing.

343

344 **Immunofluorescence.** For quantification of LifeAct or chromobody intensities during HCMV  
345 infection, cells were cultivated in BJ-Medium and seeded on Ibidi glass bottom µ-Dishes  
346 coated with Fibronectin 1:100 in Dulbecco's phosphate buffered saline (D-PBS, Sigma-Al-  
347 drich). After infection with HCMV-TB40-BAC<sub>kl.7</sub>-UL32EGFP-UL100mCherry or HCMV-  
348 UL32GFP (gift from Lüder Wiebusch) at a multiplicity of infection (MOI) of 10. Cells were fixed  
349 with 4% paraformaldehyde (Science Services) in D-PBS at 24hpi, 48hpi, and 72hpi. For im-  
350 munofluorescence (IF) staining, the cells were permeabilized with 0.1% TritonX100 in D-PBS,

351 blocked with 3% Bovine Serum Albumin (BSA) in D-PBS, and subsequently stained with a  
352 primary murine anti-IE1 antibody and a secondary Alexa 647 Goat anti-mouse antibody (Ther-  
353 mofisher). Nuclei were additionally stained with Hoechst 33342 (Thermofisher).

354 For Phalloidin staining, BJ-WT and BJ-CMV-LifeAct-mCherry-NLS were infected with HCMV-  
355 HB5-UL77-mGFP at an MOI of 1 for 24h and subsequently fixed and stained with Alexa-488-  
356 Phalloidin (Thermofisher) and Hoechst 33342 (Thermofisher).

357

358 **Microscopy** was performed with a Nikon spinning disc system consisting of a Yokogawa W2  
359 and two Andor iXON888 cameras using NIS-Elements for image acquisition. A Nikon 100x  
360 1.49 NA Apo-TIRF objective was used resulting in 130nm pixel size. The system was  
361 equipped with standard 405, 488, 561, 640 nm laser lines and corresponding filter sets. For  
362 quantification, 5x5 image tiles were acquired, resulting in a 666x666  $\mu\text{m}$  captured area.

363

364 **Image analysis** was performed with an ImageJ macro and a python Jupyter notebook (both  
365 available on github through <https://github.com/QuantitativeVirology/FIJI-Segmentor-Macro>  
366 and <https://github.com/QuantitativeVirology/FIJI-Measurement-Analyzer>). Nuclei segmenta-  
367 tion was done in ImageJ using the Hoechst channel creating regions of interest (ROIs), which  
368 were subsequently used to measure the signal intensities in the other channels of interest.  
369 Resulting mean signal intensities were processed in Python. The number of cells containing  
370 filaments was counted using the manual cell counter plugin from ImageJ. Statistical analysis  
371 was done with GraphPad PRISM.

372

373 **Single particle tracking.** For tracking of single viral particles in cell nuclei, BJ-WT cells were  
374 cultivated in BJ-Medium and infected with HCMV-HB5-UL77-mGFP (MOI of 1.5). 72hpi vid-  
375 eos of living cells were acquired with 21.45 frames per second (fps) at 37°C with 5% CO<sub>2</sub>.



376 Single nuclei were cropped, and capsids were tracked with the Fiji plugin Trackmate by Tine-  
377 vez et al. (16), using a custom batch analysis plugin (available on github through  
378 [https://github.com/QuantitativeVirology/Trackmate\\_Batch](https://github.com/QuantitativeVirology/Trackmate_Batch)). The resulting XML files were an-  
379 alyzed using custom Matlab scripts (available on github through <https://github.com/Quantita->  
380 [tiveVirology/Matlab-Trackmate-MSD](https://github.com/QuantitativeVirology/Matlab-Trackmate-MSD)), which in turn make use of the Matlab class “Mean  
381 square displacement analysis of particle trajectories”, also from Tinevez and colleagues (17).  
382 Visualization of the results was also done with Matlab.

383

384 **Electron Microscopy.** For structural analysis of nuclear actin assemblies, Sapphire discs (M.  
385 Wohlwend) with a diameter of 3mm and a thickness of 0.17mm were pre-cleaned by immer-  
386 sion in soapy water and sonication for 10 minutes. Afterward, the discs were washed in >99%  
387 Ethanol (Roth) twice by sonication for 10 minutes each and plasma cleaned in a Quorum  
388 Q150 plus (Quorum Technologies Ltd, UK) machine for 120 seconds and subsequently  
389 coated with a thin film of carbon through carbon cord evaporation. The discs were dried over-  
390 night at 60°C and kept at that temperature until shortly before use.

391 BJ-CMV-LifeAct-mCherry-NLS cells were cultivated in BJ-Medium and seeded on the previ-  
392 ously prepared sapphire discs. On the following day, the cells were infected with HCMV-  
393 TB40e-UL32EGFP-UL100mCherry at an MOI of 10. After 24 hours cells were imaged through  
394 live-cell spinning disc microscopy to check for LifeAct-induced filaments. Afterwards, cells  
395 were high-pressure frozen as described in (29).

396 For freeze-substitution, sapphire discs were incubated in -90°C pre-cooled freeze substitution  
397 medium consisting of 0.2% Osmium tetroxide (Science Services), 0.1% Uranyl acetate  
398 (Merck) and 5% water in Acetone (Merck) overnight at -90°C in an Arctiko DP-80 cryo porter

399 (Arctiko, Denmark) and subsequently thawed by stopping the cooling and leaving the machine  
400 to warm to room temperature.

401 The freeze-substituted samples were subsequently embedded in Epon and cut into ultrathin  
402 50nm slices using a Leica Ultracut microtome (Leica, Germany). The slices were transferred  
403 to copper mesh grids, post-stained in saturated Uranyl acetate in 70% Ethanol (Roth) for 7  
404 minutes and subsequently imaged using an FEI Tecnai F20 electron microscope (Ther-  
405 mofisher, USA).

406

## 407 **Acknowledgments**

408 We thank Christian Sinzger (University of Ulm, Germany) for the gift of dual-color HCMV  
409 through Jens von Einem (University of Ulm, Germany). We also thank Lüder Wiebusch (Char-  
410 ite Berlin) for HCMV-UL32GFP. pEGFP-C1 LifeAct-EGFP-2XNLS was a gift from Dyche Mul-  
411 lins through Addgene (plasmid # 58467). LeGO-iC2 was a kind gift of Kristoffer Riecken and  
412 Boris Fehse (UKE Hamburg). This study was funded through a Wellcome Trust collaborative  
413 award to JBB (209250/Z/17/Z) and KG (209250/Z/17/Z). The Heinrich Pette Institute, Leibniz  
414 Institute for Experimental Virology is supported by the *Free and Hanseatic City of Hamburg*  
415 and the *Federal Ministry of Health*. MM and KG are supported by the Cluster of Excellence  
416 RESIST (EXC 2155), Hannover Medical School, Hannover, Germany.

417

## 418 **References**

419

420 1. Sanchez V, Greis KD, Sztul E, Britt WJ. 2000. Accumulation of Virion Tegument and En-  
421 velope Proteins in a Stable Cytoplasmic Compartment during Human Cytomegalovirus Rep-  
422 lication: Characterization of a Potential Site of Virus Assembly. *J Virol* 74:975–986.

423

424 2. Sanchez V, Sztul E, Britt WJ. 2000. Human Cytomegalovirus pp28 (UL99) Localizes to a  
425 Cytoplasmic Compartment Which Overlaps the Endoplasmic Reticulum-Golgi-Intermediate  
426 Compartment. *J Virol* 74:3842–3851.

427

428 3. Mettenleiter TC, Müller F, Granzow H, Klupp BG. 2013. The way out: what we know and  
429 do not know about herpesvirus nuclear egress. *Cell Microbiol* 15:170–178.

430

431 4. Forest T, Barnard S, Baines JD. 2005. Active intranuclear movement of herpesvirus cap-  
432 sids. *Nature Cell Biology* 7:429–431.

433

434 5. Feierbach B, Piccinotti S, Bisher M, Denk W, Enquist LW. 2006. Alpha-Herpesvirus Infec-  
435 tion Induces the Formation of Nuclear Actin Filaments. *PLoS Pathogens* 2:e85.

436

437 6. Bosse JB, Viriding S, Thiberge SY, Scherer J, Wodrich H, Ruzsics Z, Koszinowski UH,  
438 Enquist LW. 2014. Nuclear Herpesvirus Capsid Motility Is Not Dependent on F-Actin. *Mbio*  
439 5:e01909-14.

440

441 7. Bosse JB, Hogue IB, Feric M, Thiberge SY, Sodeik B, Brangwynne CP, Enquist LW.  
442 2015. Remodeling nuclear architecture allows efficient transport of herpesvirus capsids by  
443 diffusion. *Proceedings of the National Academy of Sciences* 112:E5725–E5733.

444

445 8. Myllys M, Ruokolainen V, Aho V, Smith EA, Hakanen S, Peri P, Salvetti A, Timonen J,  
446 Hukkanen V, Larabell CA, Vihinen-Ranta M. 2016. Herpes simplex virus 1 induces egress

447 channels through marginalized host chromatin. *Scientific Reports* 6:28844.

448

449 9. Aho V, Myllys M, Ruokolainen V, Hakanen S, Mäntylä E, Virtanen J, Hukkanen V, Kühn  
450 T, Timonen J, Mattila K, Larabell CA, Vihinen-Ranta M. 2017. Chromatin organization regu-  
451 lates viral egress dynamics. *Sci Rep-uk* 7:3692.

452

453 10. Wilkie AR, Lawler JL, Coen DM. 2016. A Role for Nuclear F-Actin Induction in Human  
454 Cytomegalovirus Nuclear Egress. *mBio* 7:e01254-16.

455

456 11. Wilkie AR, Sharma M, Pesola JM, Ericsson M, Fernandez R, Coen DM. 2018. A Role  
457 for Myosin Va in Human Cytomegalovirus Nuclear Egress. *J Virol* 92:e01849-17.

458

459 12. Borst E, Bauerfeind R, Binz A, Stephan T, Neuber S, Wagner K, Steinbrück L, Sodeik B,  
460 Roviš T, Jonjić S, Messerle M. 2016. The Essential Human Cytomegalovirus Proteins  
461 pUL77 and pUL93 Are Structural Components Necessary for Viral Genome Encapsidation.  
462 *J Virol* 90:5860–5875.

463

464 13. Du J, Fan Y, Chen T, Feng X. 2015. Lifeact and Utr230 induce distinct actin assemblies  
465 in cell nuclei. *Cytoskeleton* 72:570–575.

466

467 14. Belin BJ, Mullins DR. 2013. What we talk about when we talk about nuclear actin. *Nucl*  
468 *Austin Tex* 4:291–7.

469

470 15. Melak M, Plessner M, Grosse R. 2017. Actin visualization at a glance. *J Cell Sci*  
471 130:jcs.189068.

472

473 16. Tinevez J-Y, Perry N, Schindelin J, Hoopes GM, Reynolds GD, Laplantine E, Bednarek  
474 SY, Shorte SL, Eliceiri KW. 2017. TrackMate: An open and extensible platform for single-  
475 particle tracking. *Methods San Diego Calif* 115.

476

477 17. Tarantino N, Tinevez J-Y, Crowell E, Boisson B, Henriques R, Mhlanga M, Agou F, Is-  
478 raël A, Laplantine E. 2014. TNF and IL-1 exhibit distinct ubiquitin requirements for inducing  
479 NEMO–IKK supramolecular structures. *J Cell Biology* 204:231–245.

480

481 18. Kokai E, Beck H, Weissbach J, Arnold F, Sinske D, Sebert U, Gaiselmann G, Schmidt  
482 V, Walther P, Münch J, Posern G, Knöll B. 2014. Analysis of nuclear actin by overexpres-  
483 sion of wild-type and actin mutant proteins. *Histochemistry and Cell Biology* 141:123–135.

484

485 19. Jones N, Lewis J, Kilpatrick. 1986. Cytoskeletal disruption during human cytomegalovi-  
486 rus infection of human lung fibroblasts. *Eur J Cell Biol* 41:304–12.

487

488 20. Belin BJ, Cimini BA, Blackburn EH, Mullins DR. 2013. Visualization of actin filaments  
489 and monomers in somatic cell nuclei. *Molecular Biology of the Cell* 24:982–994.

490

491 21. Courtemanche N, Pollard TD, Chen Q. 2016. Avoiding artefacts when counting polymer-  
492 ized actin in live cells with LifeAct fused to fluorescent proteins. *Nat Cell Biol* 18:676–683.

493

494 22. Munsie LN, Caron N, Desmond CR, Truant R. 2009. Lifeact cannot visualize some  
495 forms of stress-induced twisted f-actin. *Nat Methods* 6:nmeth0509-317.

496

497 23. Riedl J, Crevenna AH, Kessenbrock K, Yu J, Neukirchen D, Bista M, Bradke F, Jenne  
498 D, Holak TA, Werb Z, Sixt M, Wedlich-Soldner R. 2008. Lifeact: a versatile marker to visual-  
499 ize F-actin. *Nat Methods* 5:605–607.

500

501 24. Viita T, Vartiainen MK. 2016. From Cytoskeleton to Gene Expression: Actin in the Nu-  
502 cleus. *Handb Exp Pharmacol*.

503

504 25. Flores LR, Keeling MC, Zhang X, Sliogeryte K, Gavara N. 2019. Lifeact-GFP alters F-  
505 actin organization, cellular morphology and biophysical behaviour. *Sci Rep-uk* 9:3241.

506

507 26. Sampaio K, Jahn G, Sinzger C. 2013. Virus-Host Interactions, Methods and Protocols.  
508 *Methods Mol Biology Clifton N J* 1064:201–209.

509

510 27. Sampaio K, Cavnignac Y, Stierhof Y-D, Sinzger C. 2005. Human Cytomegalovirus La-  
511 beled with Green Fluorescent Protein for Live Analysis of Intracellular Particle Movements. *J*  
512 *Virology* 79:2754–2767.

513

514 28. Weber K, Bartsch U, Stocking C, Fehse B. 2008. A Multicolor Panel of Novel Lentiviral  
515 “Gene Ontology” (LeGO) Vectors for Functional Gene Analysis. *Mol Ther*.

516

517 29. Höhn K, Sailer M, Wang L, Lorenz M, Schneider ME, Walther P. 2011. Preparation of  
518 cryofixed cells for improved 3D ultrastructure with scanning transmission electron tomogra-  
519 phy. *Histochem Cell Biol* 135:1–9.

## 520 **Figure legends**

521 **Figure 1. A very small fraction of cells shows nuclear F-Actin after HCMV infection.** BJ-  
522 SFFV-LifeAct-mCherry-NLS cells were infected with HCMV-TB40/e-UL32EGFP-  
523 UL100mCherry, fixed at 24hpi and stained for DNA (Hoechst) and HCMV-IE (Anti-IE1). **(A)**  
524 Representative image of very rare nuclear actin filaments. Scale bar indicates 10  $\mu$ m. **(B)**  
525 Quantification of the filament rates. Large tiles spanning 0.75x0.75  $\mu$ m were acquired and  
526 quantified in ImageJ and Python using scripts (see Materials and Methods). Filaments were  
527 manually counted. Means of three independent replicates are shown. Bars indicate standard  
528 deviations.

529

530 **Figure 2: LifeAct-mCherry-NLS signal diminishes with ongoing infection.** BJ-SFFV-Life-  
531 Act-mCherry-NLS cells were infected with HCMV-TB40/e-UL32EGFP-UL100mCherry, fixed  
532 at the indicated time points and stained for DNA (Hoechst) and HCMV-IE (Anti-IE1). pUL32-  
533 EGFP serves as a marker for late gene expression. **(A)** LifeAct-mCherry-NLS signal intensity  
534 drops with ongoing infection. Scale bars indicate 10  $\mu$ m. **(B)** Quantification of subcellular Life-  
535 Act vs. IE signal intensities at 24, 48 and 72hpi using automated microscopy image analysis.  
536 **(C)** LifeAct intensity over time. For comparison, all image intensities are scaled to the same  
537 level in Fig. 2 and 3. Scale bars indicate 10  $\mu$ m.

538

539 **Figure 3. Changing the promoter of the LifeAct expression constructs alters expres-**  
540 **sion dynamics in infection.** BJ-CMV-LifeAct-mCherry-NLS cells were infected with HCMV-  
541 TB40/e-UL32EGFP-UL100mCherry, fixed at the indicated time points and stained for DNA  
542 (Hoechst) and HCMV-IE (Anti-IE1). pUL32-EGFP serves as a marker for late gene expres-

543 sion. **(A)** LifeAct-mCherry-NLS signal intensity drops with ongoing infection. Scale bars indi-  
544 cate 10  $\mu\text{m}$ . **(B)** Quantification of subcellular LifeAct vs. IE signal intensities at 24, 48 and  
545 72hpi by automated microscopy image analysis. **(C)** LifeAct intensity over time. All image  
546 intensities are scaled to the same level in Fig. 2 and 3 for comparison. Scale bars indicate 10  
547  $\mu\text{m}$ .

548

549 **Figure 4. Induction of nuclear filamentous structures is dependent on LifeAct expres-**  
550 **sion.** BJ-CMV-LifeAct-mCherry-NLS cells were infected with HCMV-TB40/e-UL32EGFP-  
551 UL100mCherry, fixed at the indicated time points and stained for DNA (Hoechst) and HCMV-  
552 IE (Anti-IE1). **(A-D)** Rate of LifeAct nuclear filaments in infected IE-1-positive cells. Four rep-  
553 licates with different base-line expression levels of LifeAct are shown as quantified in **(E)**. **(F)**  
554 Difference in LifeAct-mCherry-NLS signal intensity in the cells with filaments (+), compared  
555 to those without (-).

556

557 **Figure 5. Strong LifeAct-mCherry-NLS expression and filaments induction block pro-**  
558 **gress of infection.** BJ-CMV-LifeAct-mCherry-NLS cells were infected with HCMV-TB40/e-  
559 UL32EGFP-UL100mCherry, fixed at 72hpi and stained for DNA (Hoechst) and HCMV-IE  
560 (Anti-IE1). pUL32-EGFP serves as a marker for late gene expression. **(A)** Cells that show  
561 pUL32-EGFP expression have very little LifeAct-mCherry-NLS signal. Scale bar indicates 20  
562  $\mu\text{m}$ . **(B)** Scatter plot of nuclear LifeAct-mCherry-NLS vs. pUL32-EGFP signal compared to  
563 the nuclear mCherry signal.

564

565 **Figure 6. LifeAct-stained filamentous structures are detectable with Phalloidin.** WT BJ  
566 and BJ-CMV-LifeAct-mCherry-NLS were infected with HCMV-HB5-UL77-mGFP at an MOI of  
567 10 for 24 hours, fixed, and stained for IE1, as well as with Alexa-488-Phalloidin. The arrow



568 indicates a representative BJ-CMV-LifeAct-mCherry-NLS cell in which the same nuclear actin  
569 structures are stained by both LifeAct as well as by Phalloidin. Scale bar is 10  $\mu\text{m}$ .

570

571 **Figure 7. A LifeAct-mCherry fusion missing the NLS does not induce nuclear filaments.**

572 BJ-CMV-LifeAct-mCherry, WT BJ and BJ-CMV-LifeAct-mCherry-NLS were infected with  
573 HCMV-HB5-UL77-mGFP at an MOI of 10 for 24 hours, fixed, and stained for IE1, as well as  
574 with Alexa-488-Phalloidin. **(A)** No nuclear LifeAct-mCherry-stainable structures were ob-  
575 served without the NLS. For comparison, infected WT-BJ cells stained with Alexa-488-Phal-  
576 loidin, and BJ-CMV-LifeAct-mCherry-NLS are shown. Scale bars indicate 10  $\mu\text{m}$ .

577

578 **Figure 8. A nuclear anti-actin chromobody did not to detect nuclear actin structures.**

579 **(A)** BJ cells stably expressing a nuclear anti-actin chromobody were infected with HCMV-  
580 HB5-UL77-mGFP at an MOI of 10 for 24, 48 and 72 hours, fixed and stained for IE1. **(A)**  
581 Representative images illustrating that the chromobody does not detect any nuclear actin  
582 filaments in infected cells. Scale bars indicate 20  $\mu\text{m}$ . **(B)** Quantification of filament occurrence  
583 as detected by the chromobody. One representative experiment out of 3 replicates is shown.

584

585 **Figure 9. Capsids move independently of nuclear actin structures.** BJ-CMV-LifeAct-

586 mCherry-NLS cells were infected with HCMV-HB5-UL77-mGFP and imaged live at 72hpi at  
587 a frame rate of 21.45 fps. A maximum temporal projection of the GFP channel over 600  
588 frames shows diffusive green clouds of particle location. The video is available as supple-  
589 mentary video S1. Scale bar indicates 10  $\mu\text{m}$ .

590

591 **Figure 10. Single particle tracking reveals diffusion as the major nuclear capsid motility**  
592 **mode.** WT BJ cells were infected with HCMV-HB5-UL77-mGFP and imaged live at 72hpi at  
593 a frame rate of 21.45 fps, and capsids were tracked using a custom batch version of Track-  
594 mate. Tracks were subsequently analyzed utilizing MSD Analyzer, and the diffusion exponent  
595 alpha **(A)**, as well as the average corral size using an MSD plot **(B)**, were extracted. The  
596 saturation of the MSD curve at about 0.08 indicates a chromatin corral diameter of about 700  
597 nm.

598  
599 **Figure 11. Electron microscopy only reveals thick filamentous bundles in infected cells**  
600 **expressing LifeAct-mCherry-NLS.** BJ or BJ-CMV-LifeAct-mCherry-NLS cells were infected  
601 with HCMV-TB40/e-UL32EGFP-UL100mCherry, high-pressure-frozen at 24hpi and freeze-  
602 substituted. **(A)** Bundled, filamentous actin structures can be visualized in the nuclei of in-  
603 fected cells expressing LifeAct-mCherry-NLS. Bundles only appeared in a fraction of the ex-  
604 amined cells and in higher frequency closer to the nuclear envelope (see also supplementary  
605 Figure S3). **(B)** Two cells without apparent nuclear actin structures visible for comparison. For  
606 scale bar length see picture.

607

## 608 **Supplementary Material**

609

610 **Video S1 and S2. Single viral particles are moving through the nucleus of an infected**  
611 **cell.** In these videos, the nuclei of BJ-CMV-LifeAct-mCherry-NLS cell infected with HCMV-  
612 HB5-UL77-mGFP (MOI of 1.5) are shown at 72hpi. They represent rare examples in which  
613 nuclear actin assemblies and viral capsids are visible in the nucleus. Viral particles do not

614 show obvious movement along the filaments. Instead, they move in a random-walk like be-  
615 havior through the nucleoplasm.

616

617 **Figure S3. Electron micrograph of a nucleus from an infected, high-pressure frozen**  
618 **cell.** Lower section of an BJ-CMV-LifeAct-mCherry-NLS cell infected with HCMV-TB40/e-  
619 UL32EGFP-UL100mCherry which was high-pressure-frozen at 24hpi and subsequently  
620 freeze-substituted. This cell is an example of the high density of actin bundles adjacent to the  
621 nuclear envelope. (A/B) Details of the bundles shown. Scales are indicated in the pictures.

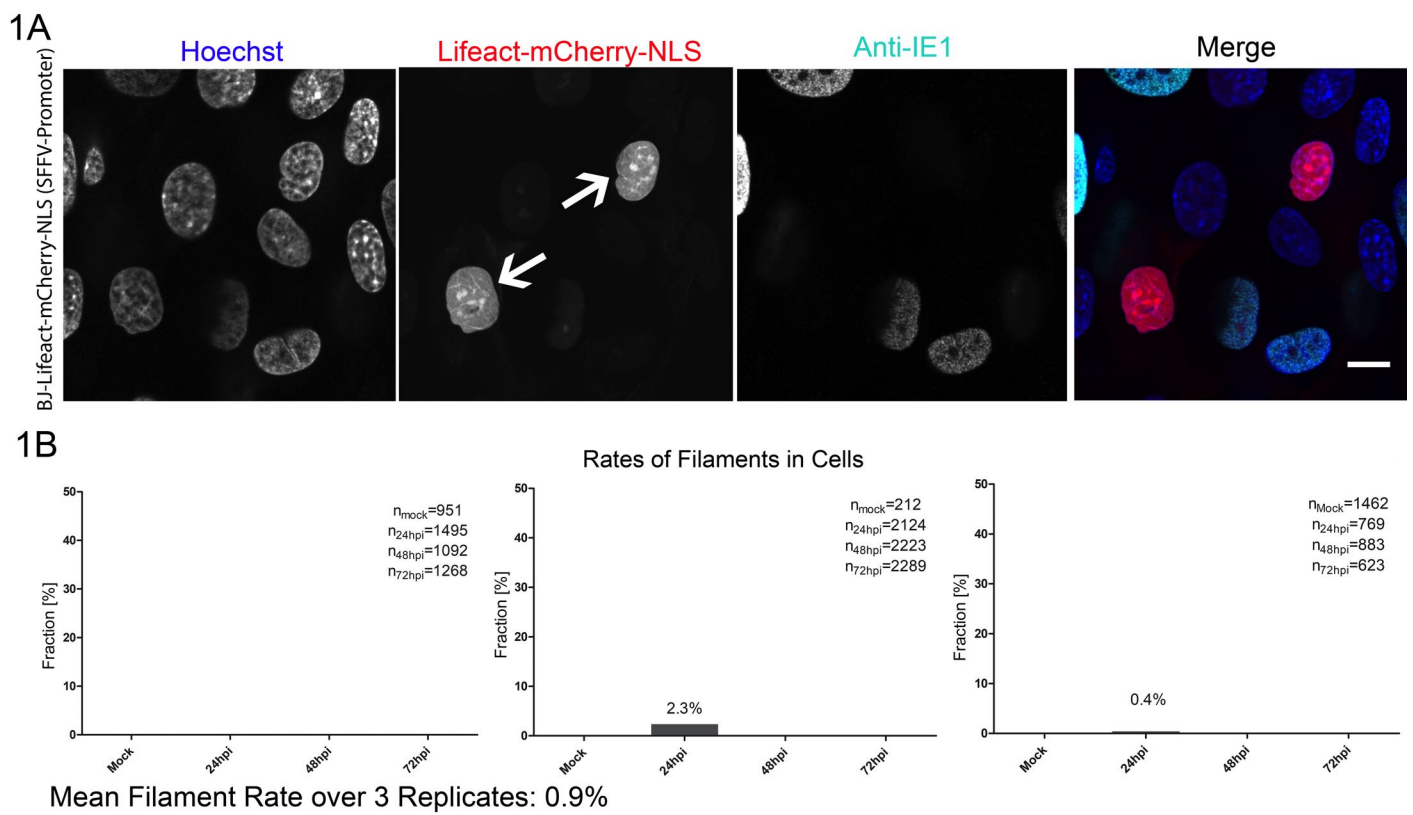

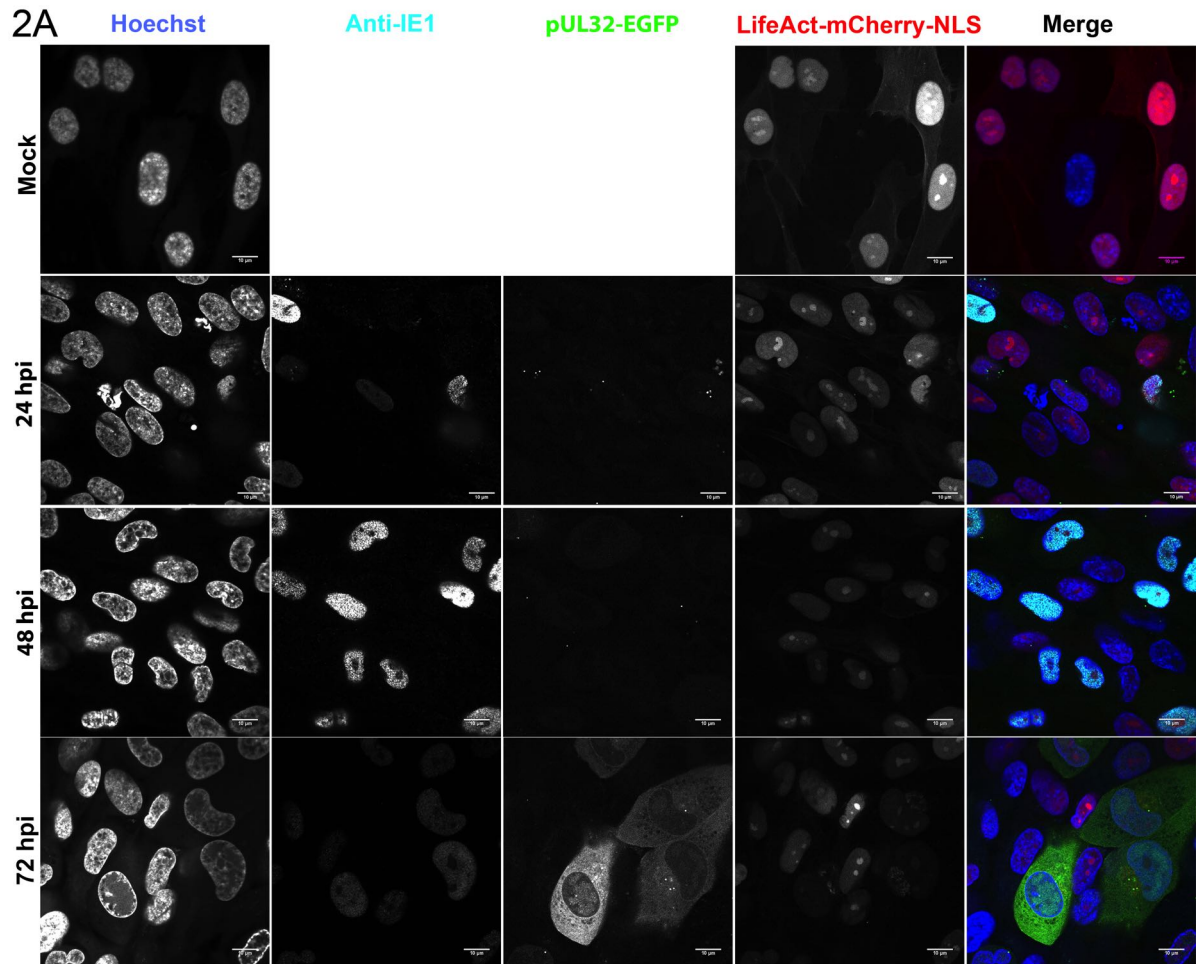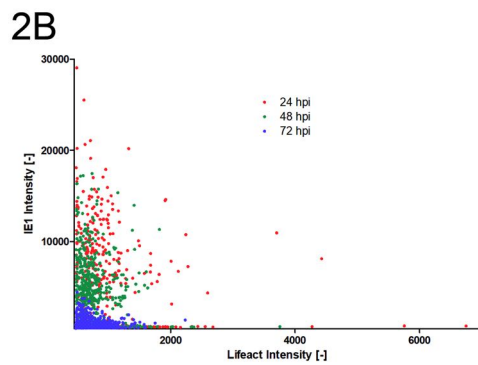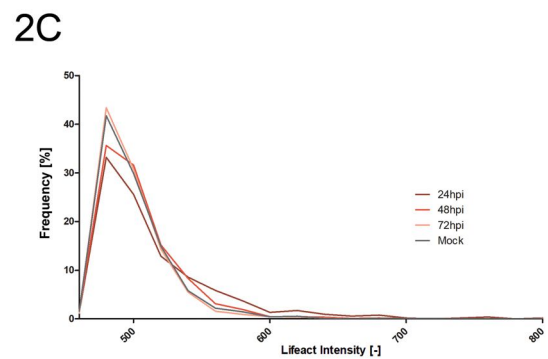

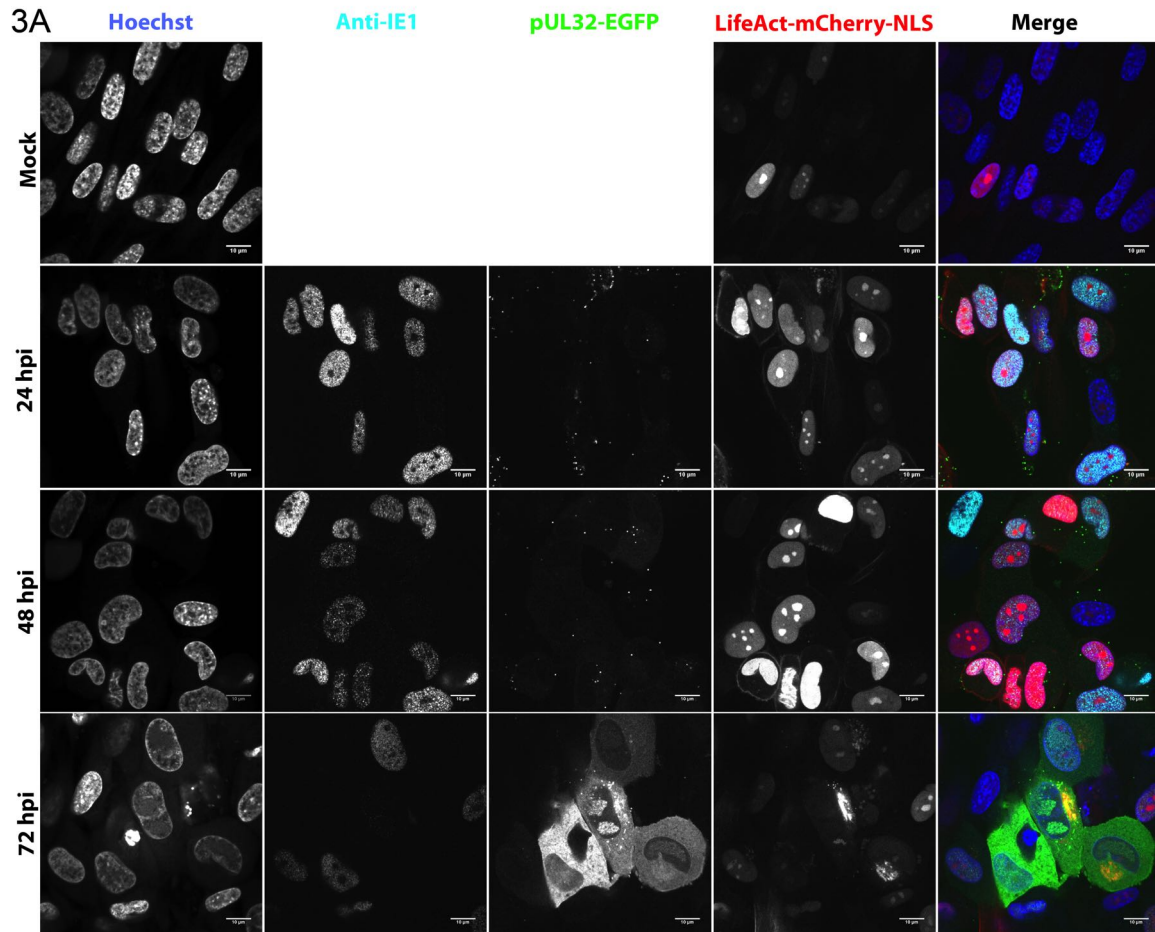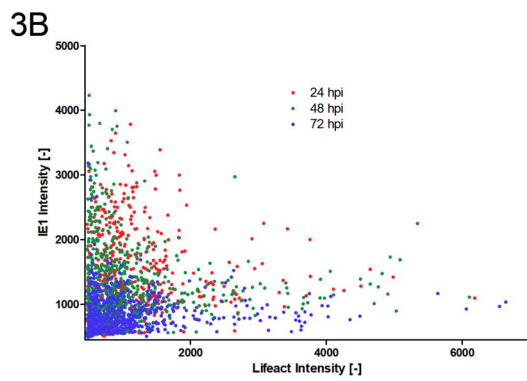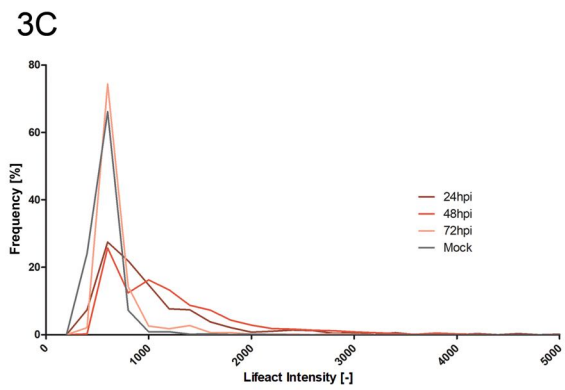

## Rate of nuclear filaments in BJ-CMV-Lifeact-mCherry-NLS

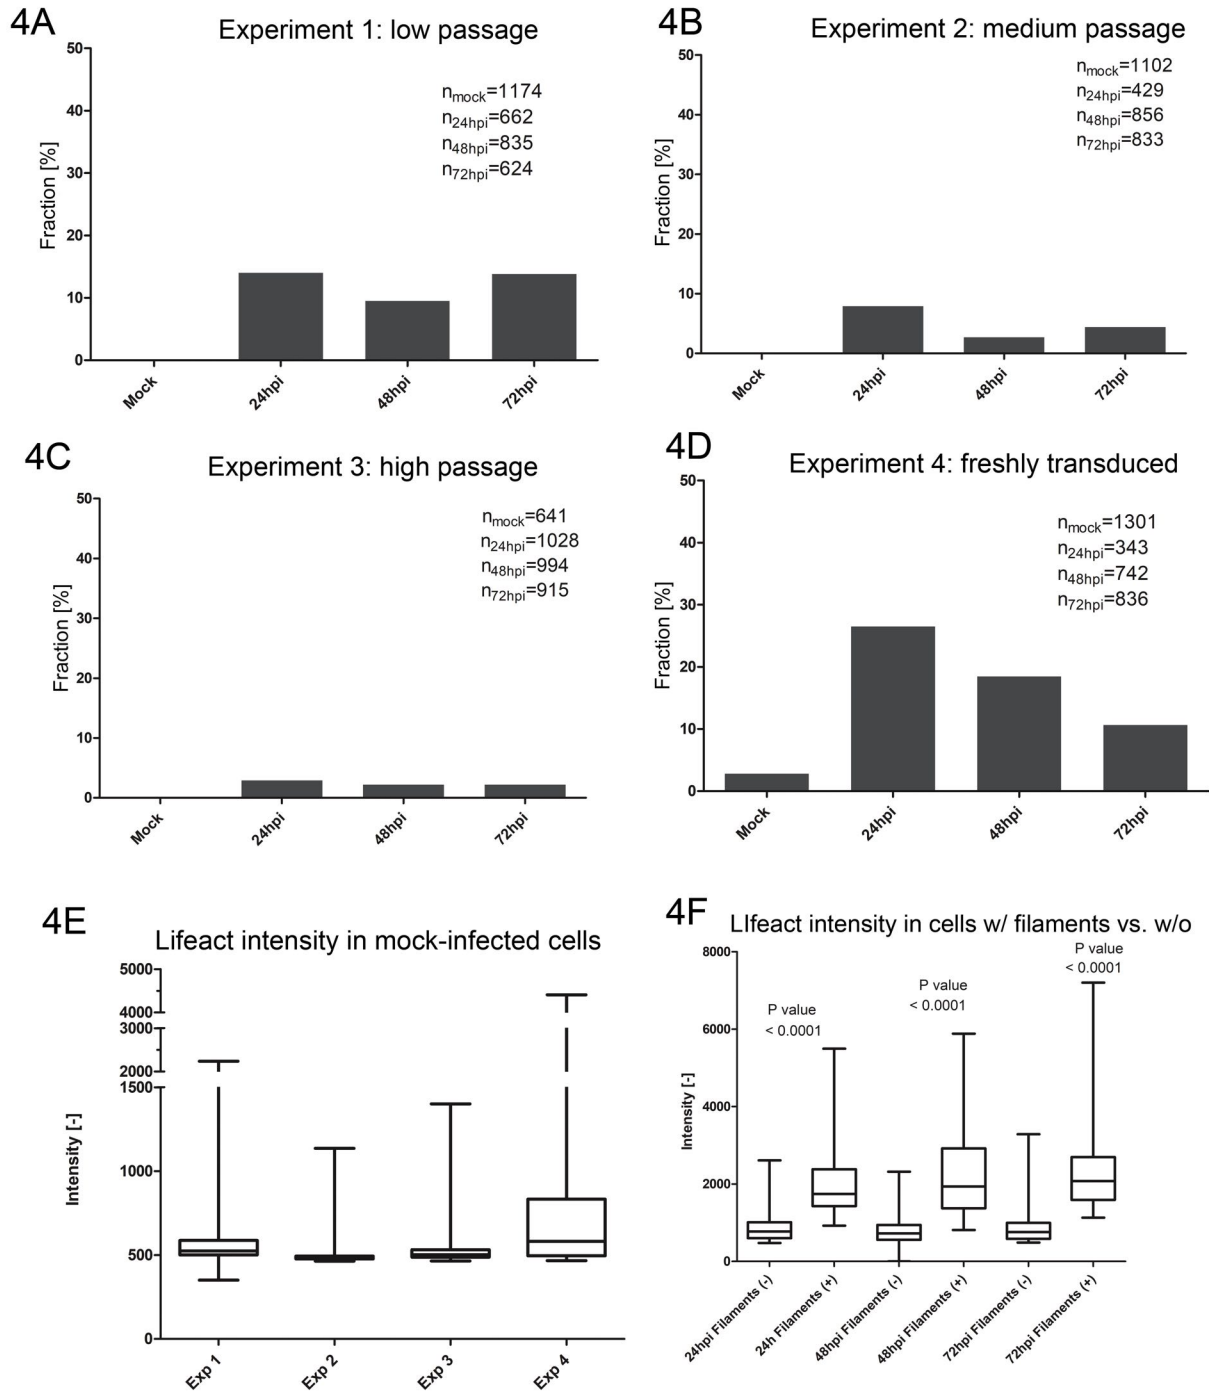



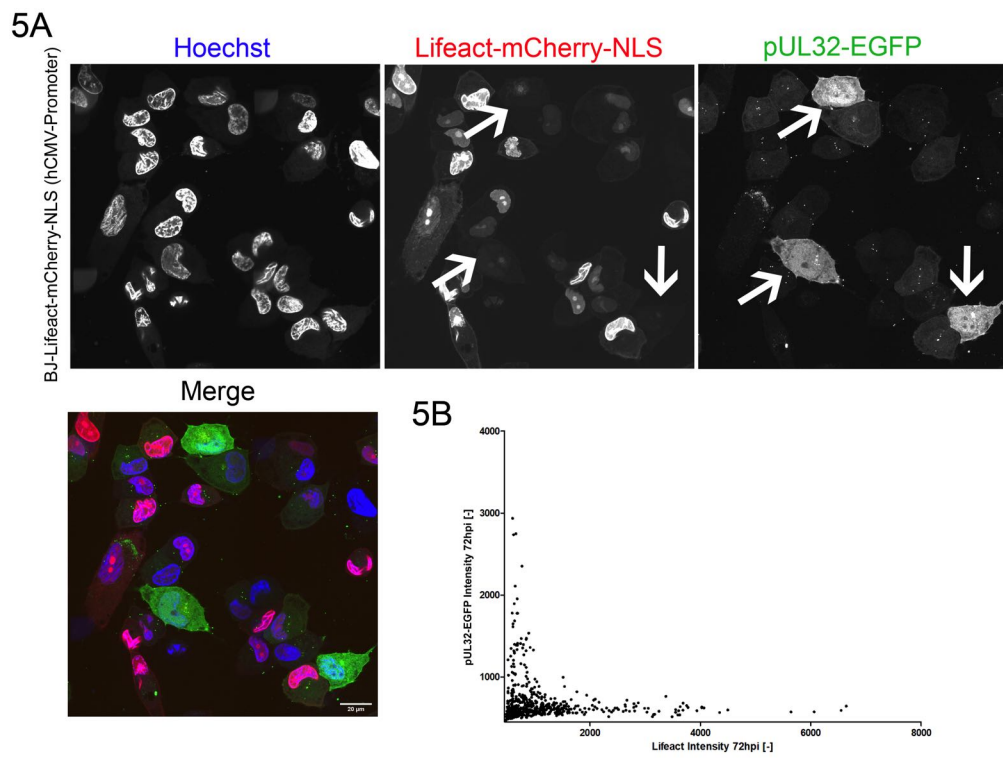



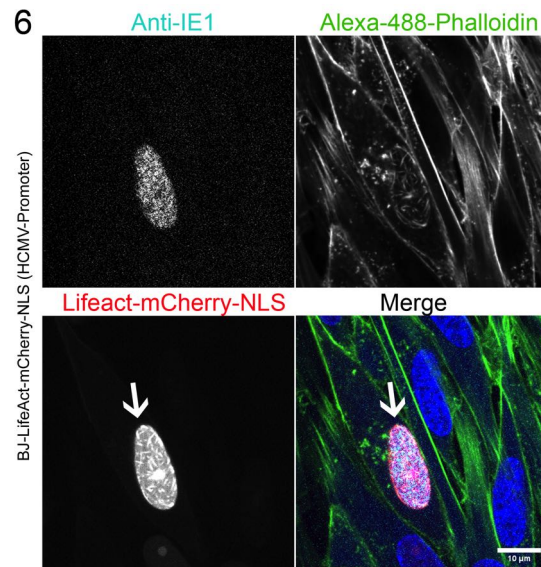

7

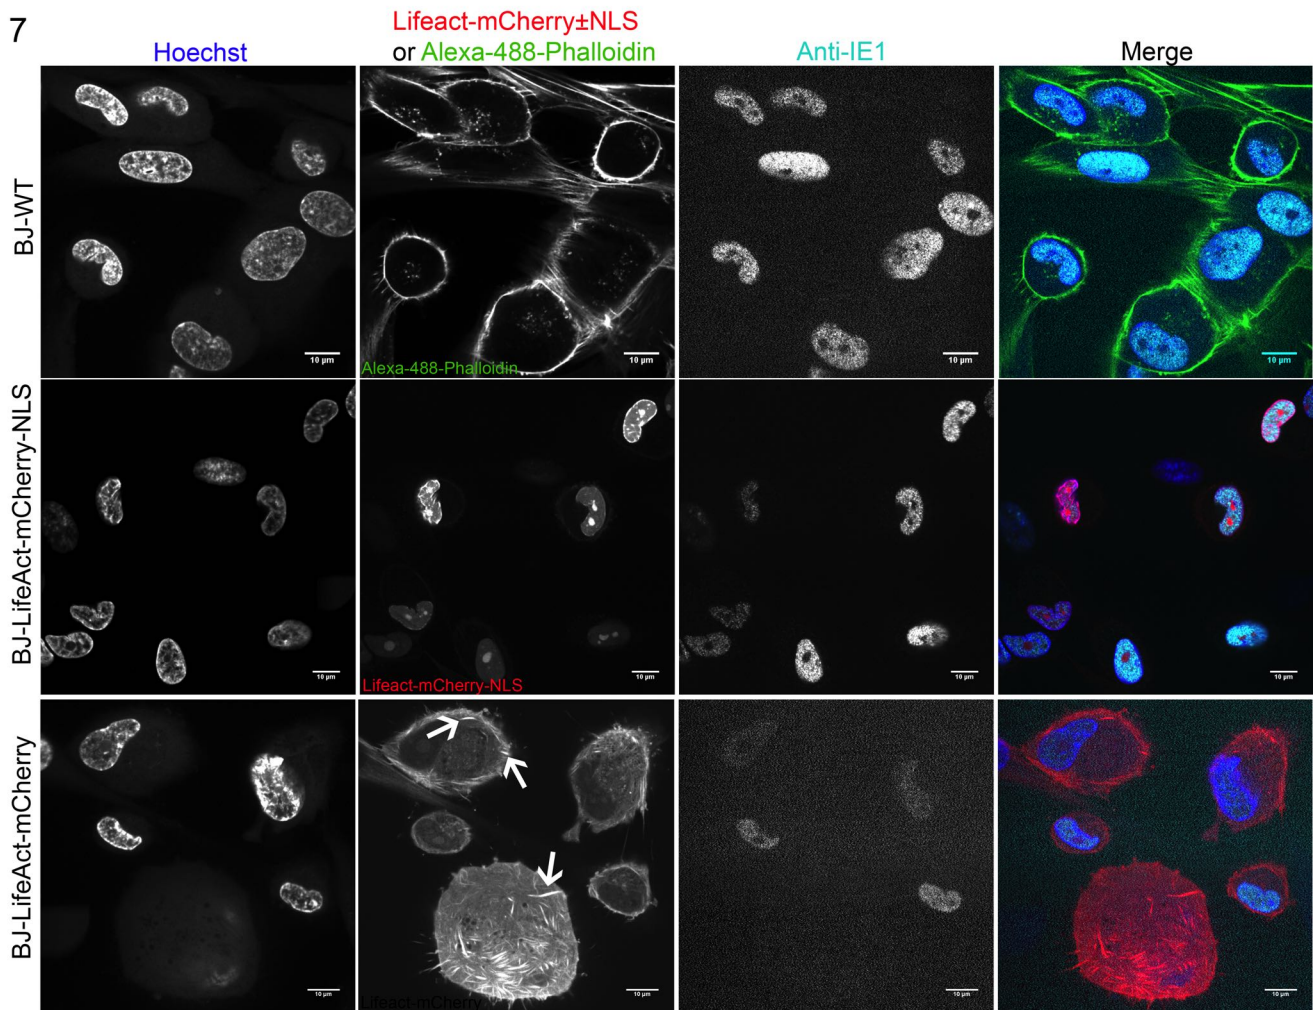

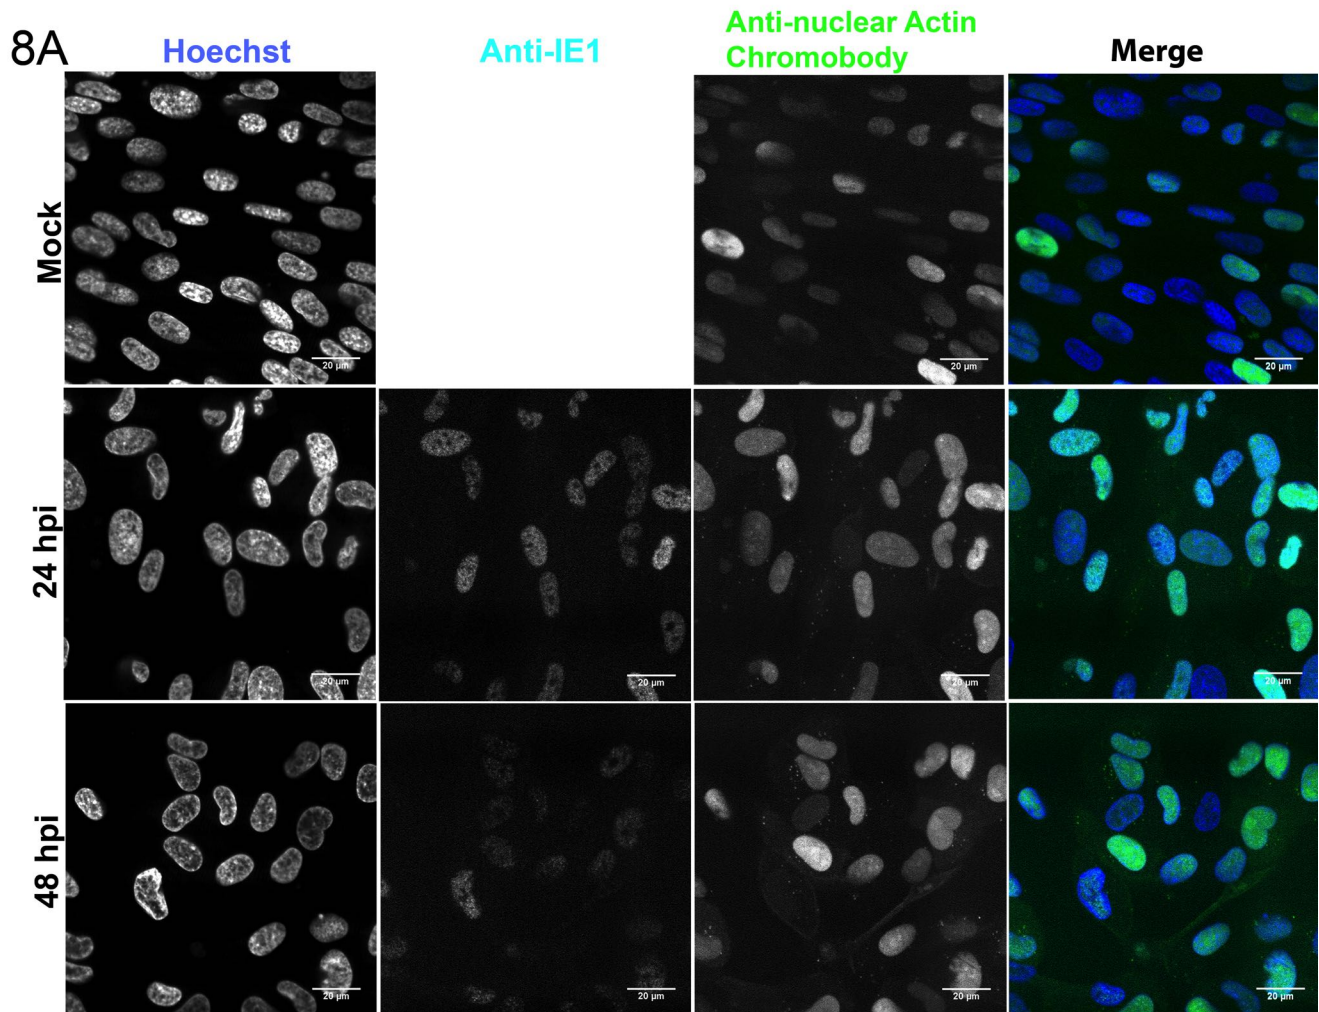

**8B**

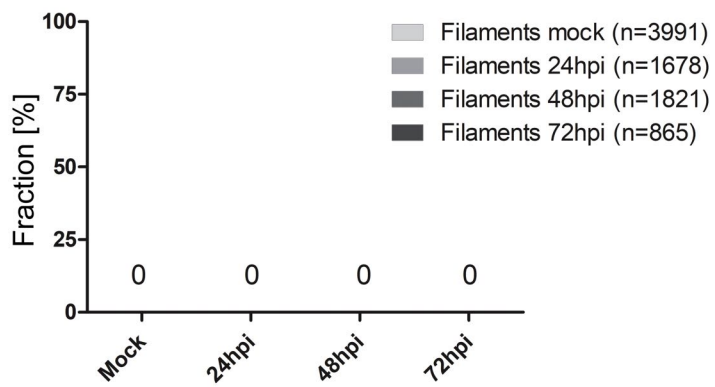

9

UL-77gfp

Lifect-mCherry-NLS

Merge

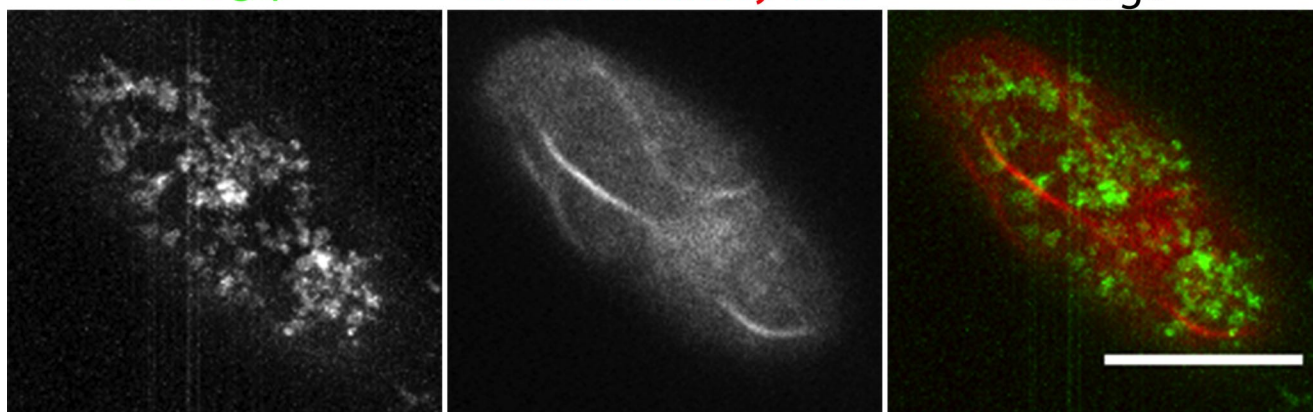

10A

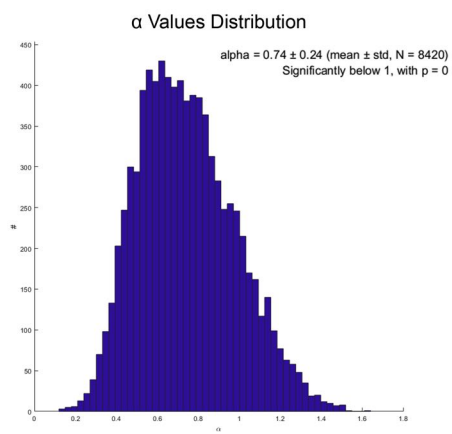

10B

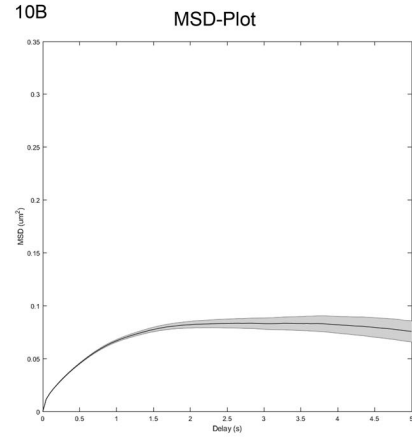



11A

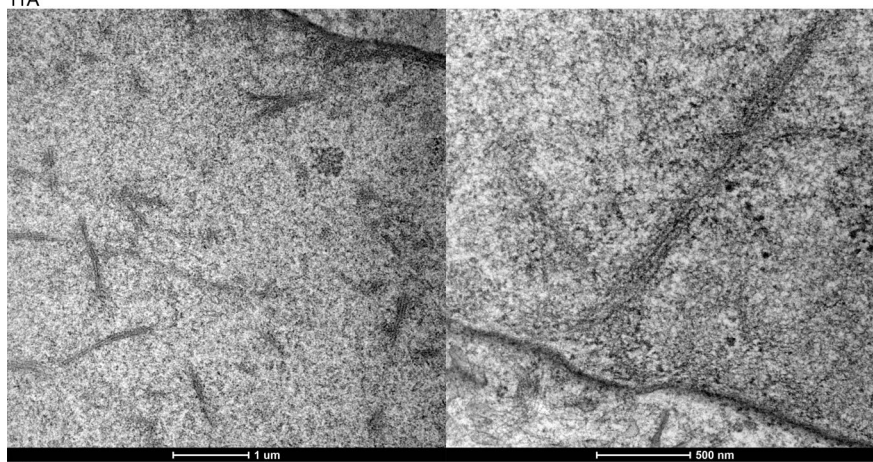

11B

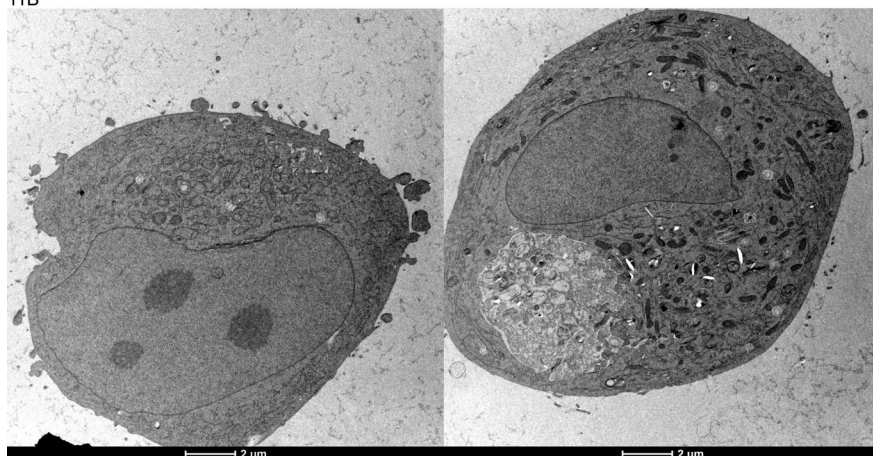

Source: https://biorxiv.org/content/biorxiv/early/2019/05/24/641266.full-text.pdf
